## Correction: NLRP6 targeting suppresses gastric tumorigenesis via P14<sup>ARF</sup>–Mdm2–P53-dependent cellular senescence

Haibin Wang<sup>1,\*</sup>, Guoxing Xu<sup>2,\*</sup>, Zhengjie Huang<sup>1,3,\*</sup>, Weizheng Li<sup>4</sup>, Huali Cai<sup>1</sup>, Yunda Zhang<sup>1</sup>, Disheng Xiong<sup>1</sup>, Gang Liu<sup>1</sup>, Shengjie Wang<sup>1</sup>, Zengfu Xue<sup>4</sup> and Qi Luo<sup>1</sup>

<sup>1</sup> Department of Gastrointestinal Surgery, Xiamen Cancer Hospital, The First Affiliated Hospital of Xiamen University, Xiamen 361003, Fujian, China

<sup>2</sup> Department of Endoscopy Center, The First Affiliated Hospital of Xiamen University, Xiamen 361003, Fujian, China

<sup>3</sup> Department of Gastrointestinal Surgery, First Clinical Medical College of Fujian Medical University, Fuzhou 350004, China

<sup>4</sup> Department of Cancer Prevention, Diagnosis and Treatment, Xiamen Cancer Hospital, The First Affiliated Hospital of Xiamen University, Xiamen 361003, Fujian, China

\* These authors have contributed equally to this work

**Published:** October 26, 2018

**Copyright:** Wang et al. This is an open-access article distributed under the terms of the Creative Commons Attribution License 3.0 (CC BY 3.0), which permits unrestricted use, distribution, and reproduction in any medium, provided the original author and source are credited.

**This article has been corrected:** The correct Title information is given below:

## NLRP6 targeting suppresses gastric tumorigenesis via P14<sup>ARF</sup>–Mdm2–P53-dependent cellular senescence

Original article: Oncotarget. 2017; 8:111597-111607. <https://doi.org/10.18632/oncotarget.22876>
